# Supplementary material for: Induction of site-specific chromosomal translocations in embryonic stem cells by CRISPR/Cas9
Source: PubMed Central journal article supplement (PMC4761995; doi:10.1038/srep21918), 2016-02-22
Supplement: srep21918-s1.pdf [file srep21918-s1.pdf]

## Supplemental Information

### Induction of site-specific chromosome translocations in embryonic stem cells by CRISPR/Cas9

#### Authors

Junfeng Jiang<sup>\*, 1, 2</sup>, Li Zhang<sup>\*, 2, 3</sup>, Xingliang Zhou<sup>\*, 2</sup>, Xi Chen<sup>2</sup>, Guanyi Huang<sup>2</sup>, Fengsheng Li<sup>2</sup>, Ruizhe Wang<sup>2</sup>, Nancy Wu<sup>2</sup>, Youzhen Yan<sup>2</sup>, Chang Tong<sup>2</sup>, Sankalp Srivastava<sup>2</sup>, Yue Wang<sup>§, 1</sup>, Houqi Liu<sup>§, 1, 3</sup>, Qi-Long Ying<sup>§, 2</sup>

#### Affiliations

1: Research Center of Developmental Biology, Histology and Embryology Department, Second Military Medical University, Shanghai, 200433, China

2: Eli and Edythe Broad Center for Regenerative Medicine and Stem Cell Research at USC, Department of Stem Cell Biology & Regenerative Medicine, Keck School of Medicine, University of Southern California, Los Angeles, CA, USA

3: Translational medicine center, Second Military Medical University, Shanghai, 200433, China

---

\* These authors contribute equally to this work.

§ Corresponding authors



the UCSC Genome Browser using the sequence of the PCR product of the predicted T (5:7) chromosome-long. **(e)** Sequence of the PCR product of the chromosome 5 at Cdx2 gene locus. The appearance of double peaks (arrows) straight after the sgRNA binding site, and the short fragment deletion at the predicted Cas9-cutting site suggested the generation of indel mutation in the untranslocated chromosomes 5. **(f)** Blast results using the sequence of the PCR product and CDX2 mRNA.

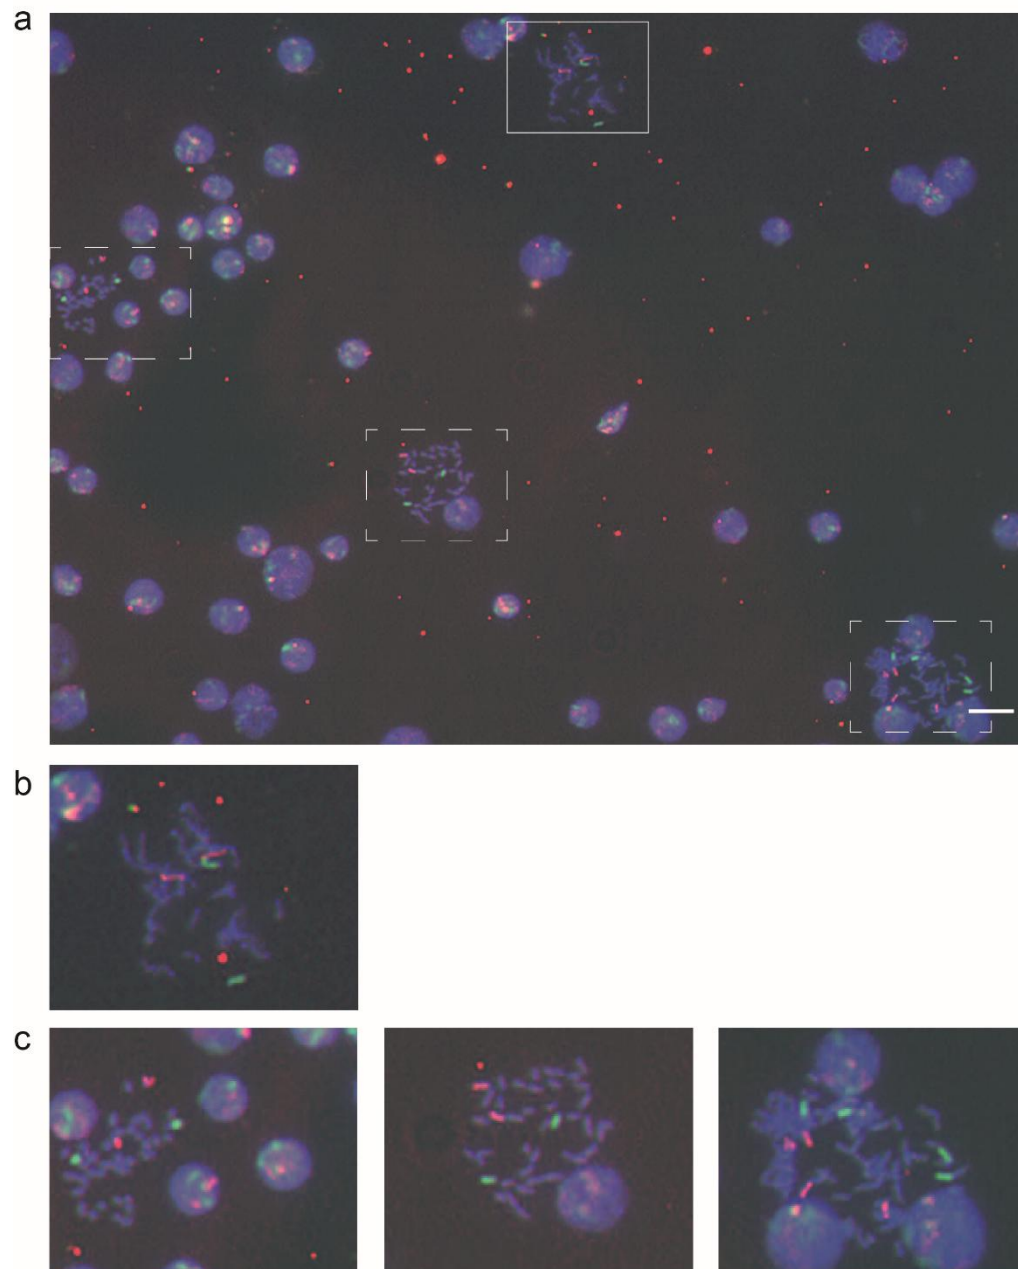

**Figure S2| Detection of the T (5:7) translocation by chromosome painting in E14-cas9 cells infected with the two sgRNA lentiviral. (a)**The pictures show chromosomes of 4 individual cells, one was detected T (5:7) translocation, and the other 3 cells did not show chromosomal translocation. **(b)** Zoomed in the cell carrying T (5:7) translocation (top frame in a) . **(c)** Zoomed in the cells with normal

chromosomes. Overall, we observed 100 cells whose chromosomes were clearly painted, and we detected 2 cells with the T (5:7) translocation. Scale bar, 10  $\mu$ m.

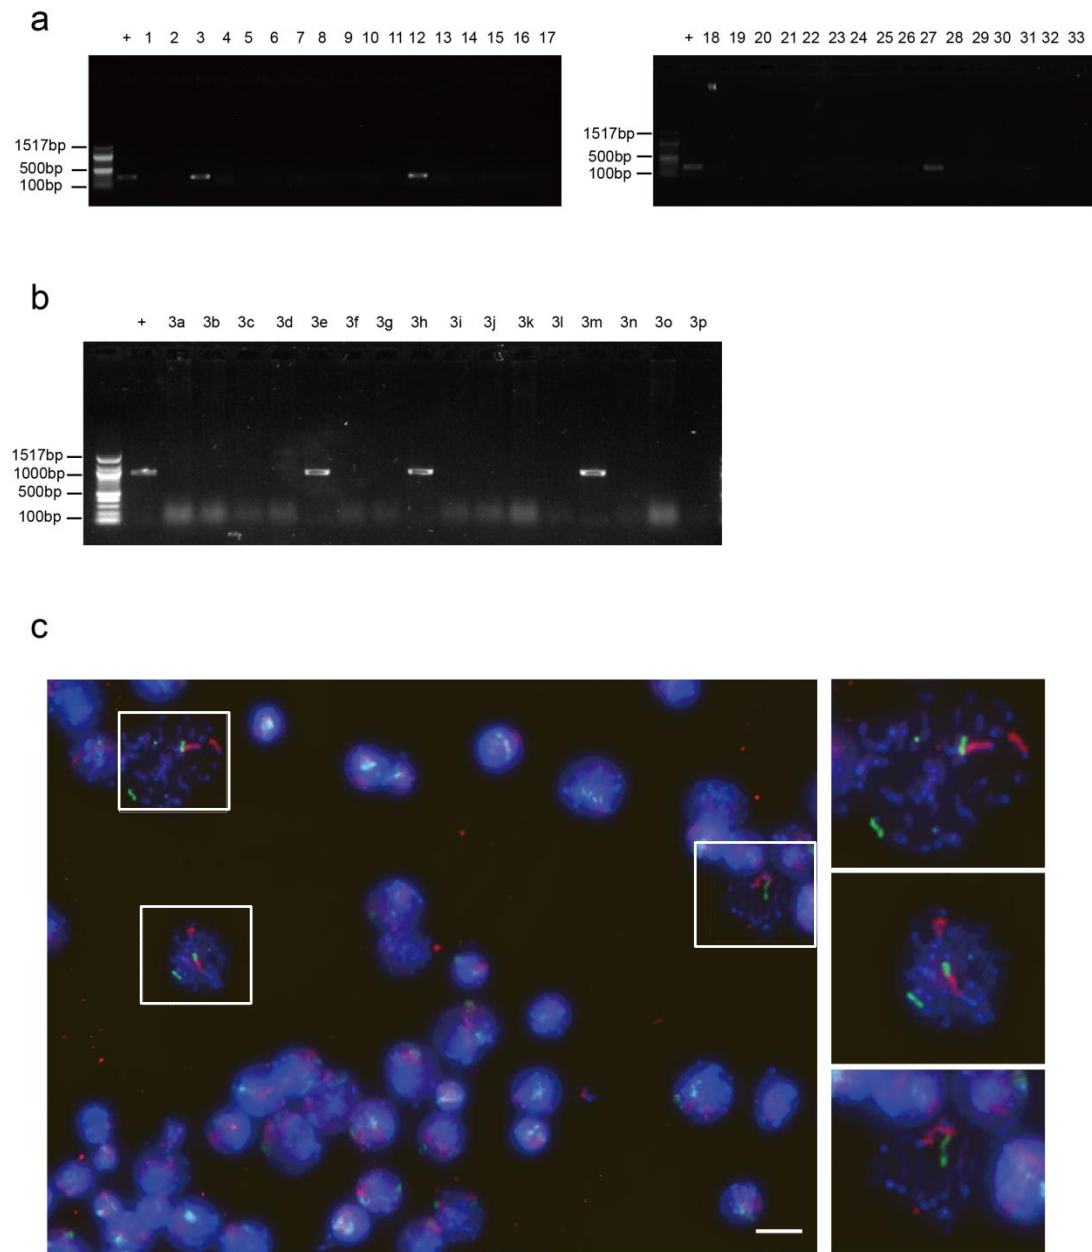

**Figure S3| Establishment of mESC line carrying T (5:7) translocation.** (a) T (5:7) chromosome-long was detected by PCR in 3 wells (No.3, No.12 and No.27) of the total 33 wells. (b) T (5:7) chromosome-short was detected by PCR in 3 (No.3e, No.3h and No.3m) of the total 16 colonies seeded from well No.3. (c) Every cells expanded from the colony No.3e carried the T (5:7) translocation. Chr5 was painted into red and Chr7 was painted into green. The inset is zoomed in on the chromosomes and the scale bar represents 10  $\mu$ m.

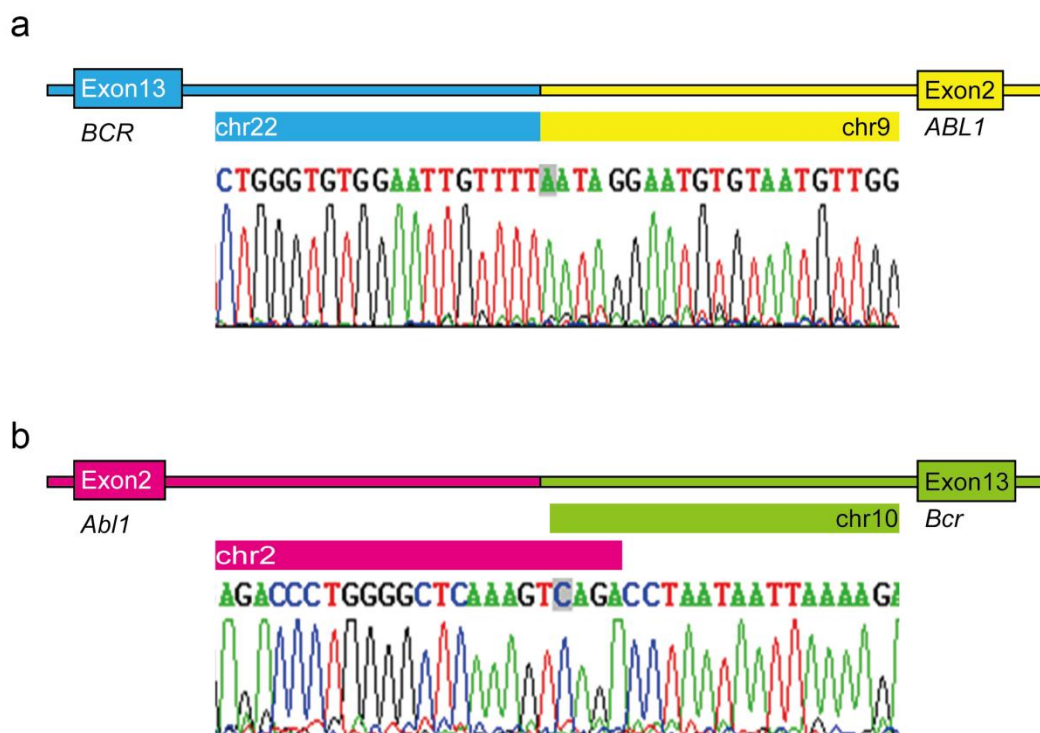

**Figure S4| Induction of the BCR-ABL associated chromosomal translocation by the CRISPR/Cas9 system. (a)** The PCR product sequence of the Philadelphia chromosome induced by co-expression of designed sgRNAs and Cas9 in HEK293 cells. The Philadelphia chromosome is a translocated chromosome related to human chronic myelogenous leukemia (CML). The result of the chromosomal translocation is that a fusion gene is created by juxtapositioning the *ABL1* gene on chromosome 9 to a part of the *BCR* gene on chromosome 22. **(b)** Partial sequence of the PCR product of the *Bcr-Abl1* fusion gene which was induced by co-expression of designed sgRNAs and Cas9 in mESCs. In mouse, the *Abl1* gene is located on chromosome 2 and the *Bcr* gene is located on chromosome 10.

### Supplemental Table

| Table 1. Chromosome translocation efficiency in E14 using CRISPR/Cas9 |                     |                   |                   |
|-----------------------------------------------------------------------|---------------------|-------------------|-------------------|
| Total Cells                                                           | Heterozygous T(5:7) | homozygous T(5:7) | normal chromosome |
| 100                                                                   | 2                   | 0                 | 98                |

Numbers of cells with T (5:7) translocation in a total 100 cells based on chromosome painting. 2 cells with heterozygous T (5:7) translocation were detected. No homozygous T (5:7) translocation was detected.

**Table 2. Summary of E14-Cas9 with T (5:7) translocation clone pickup**

|               | Cells origin                                  | Cells/well | Wells | Wells with T (5:7) |
|---------------|-----------------------------------------------|------------|-------|--------------------|
| <b>Step 1</b> | E14-Cas9 infected 2 sgRNAs                    | 5          | 33    | 3                  |
| <b>Step 2</b> | Cells from 1 well with T (5:7)<br>from step 1 | 1          | 16    | 3                  |

Efficiency of E14-Cas9 with T (5:7) translocation through colony pick-up process. Two steps were taken for clone pick-up. In step 1, sgRNA-infected E14-Cas9 cells were passaged into 96-well plate at the density of approximately 5 cells per well. Out of 33 wells, the T (5:7) translocation was identified in 3 wells by PCR analysis. In step 2, cells from one translocation-positive well in step 1 were trypsinized and seeded into a new 96-well plate at the density of 1 cells per well. Out of 16 wells, the T (5:7) translocation was identified in 3 wells by PCR analysis.

### Supplemental sequences

The target sequences of sgRNAs were:

Gsk3 $\alpha$ -sgRNA target sequence (target chromosome7):

GAT TGGTAATGGC TCATTCCGG

Cdx2-sgRNA target sequence (target chromosome7):

GTGAGCTACCTTCTGGACAAAGG

hBCR-sgRNA target sequence (target human chromosome22):

GGTGTGGAATTGTTTTCCCGG

hABL1-sgRNA target sequence (target human chromosome9):

AGATGTTAAGAAATGAAATAGG

mBCR-sgRNA target sequence (target mouse chromosome10):

AGGAGGCCTGGGCTACCCAAAGG

mABL1-sgRNA target sequence (target mouse chromosome2):

TTTTACTTAAACCACCATAAAGG

The protospacer-associated motif (PAM) sequences were underlined.

Primer sequences used in real-time PCR experiments :

| Gene      | Forward sequence(5'-3') | Reverse sequence(5'-3') |
|-----------|-------------------------|-------------------------|
| Gapdh     | TGTGAGGGAGATGCTCAGTG    | TGTCCTACCCCCAATGTGT     |
| Oct4      | AAGCAGAAGAGGATCACCTTG   | TTCTTAAGGCTGAGCTGCAAG   |
| Nanog     | TCCAGAAGAGGGCGTCAGAT    | CAAATCCCAGCAACCACATG    |
| Sox1      | CTCCTCGGCTGAATTCTTTG    | TGTAATCCGGGTGTTCTTTC    |
| Nestin    | CTCGAGCAGGAAGTGGTAGG    | TTGGGACCAGGGACTGTTAG    |
| Brachyury | CCGGTGCTGAAGGTAAATGT    | CCTCCATTGAGCTTGTGGT     |
| Mix11     | TTGAATTGAACCCTGTTGTCCC  | GAAACCCGTTCCTCCCATCCACC |
| Afp       | TCGTATTCCAACAGGAGG      | AGGCTTTTGCTTCACCAG      |
| Foxa2     | CCTCAAGGGAGCAGTCTCAC    | TTCTCCTGGTCCGGTACAC     |

Sequence of PCR product using primer chr-long-p1 and chr-long-p2 :

**5'-ACGCGGNGGGCCAGGATGGCCCTGGGGACTGAGCGCTGTCCAAGT**  
**TCGCCGTAGCAGCCGCCGCGGCCACGTTGGTAACCACCGTAGTCC**  
**GGGTACTGCGGAGGACTGACAAAGTTCTGCGGAGCCAGGTTCAGGCC**  
**GCCGGAGTGGCGCACGGAGCTAGGATACATGCTCACGTCCTTGTAGC**  
**TGTACCAATCACTTTGATGTCAGTGTAAGCCACTTCTTGGGAACGCTC**  
**TGGGCCTTGGCCTACAGTGGCTACCACTGTGGTCACCTTCCCGCTGT**  
**CACCTAAGGAACA-3'**

Sequence of PCR product using primer chr-short-p1 and chr-short-p2 :

**5'-TATTCCCCCTCCCAATCATTCTTCTCCTCCCCCTCTCCTTGGGCC**  
**CATGCTTAAGTTCCAATGAAATCCCAGGCTCAAGCTGGTGAGCTGCT**  
**ATGGTATATAAATGTGCTTGCCATGCGAGCTTCAAGTCCTGAGTTCAG**  
**TCTCTGAATTCCACAGTGGAAGGTGAACCAACTTCCAACAGCTGCTCC**  
**TGACCTCCACAGACAGACCATGGCCACACTTACAGACAGACATAACG**  
**TAGGCACACATTAATAAGTAATATTGAGAACATGAAATTCGGGGCTCC**  
**AACTCTATTGCTAGGTACACTCAGCAGTCACTCCCAGCGCCCAAACCT**  
**CCAGTCTACCCAAGCTACCTTGAACCTTTTGTCCCTGAAGAACCTTCTT**  
**GATGGCCACCAGTTCCTCGTCTCTGCCAGCCGTGCCTGGTATA**C**CA**  
**GAAGGTAGCTCACGTACATGGTGGCGAGGGACCCAGAGCAGACCTCA**  
**CCATGCTGTCTGGGGACAAACGTTGAAGGCTGCCAGAGGCGCGAGGC**  
**GCAGGGGGCTAGAGATAAAGGTAGCTGGCTGCACCTCAGCCCACGGT**

GCTCCGTCGGCTCCTTGCAGAGCTTCTGCCTCCCGGGCAGTCCCTCC  
CTCCGTCCTGCCTCCTCCCCTCTCTTCCTTCTTTCCTCCCACCTCCTTG  
CCAGTAAGCTGTAGAGGGCGGGGATGACCCGCCGCAGGTTGGCTCGC  
GGAGTCCCAGGCCAGCGGCCTTACGTGATTAACGAGTGTTTACAAGA  
CTCTATTAGTAATGACACAGACACCAATGGCTGGAGACGTCGAGGCG  
CAGCGCGCTACGCACACAGTCCCCACCACCACCACCCCCAGAAACAC-

3

PCR product sequence of BCR/ABL1 translocation in mESCs :

5'-TCTGTTGCTCAGGAGTACACAGGGGACAACCTCTGCCTTGGCATCTA  
AGCTCATACAAATTTACTCATCAAGAGTTTTGTTCTATTGCAAGGAA  
ACGTTTTAGGGAAAAATGCTTTTGCTTGGGGGAATTA AAAACAGTAGAA  
AACCTCAAGTTTCCAGCCTGGGGTTCAGGTGTCTTCTGTAGGAACAT  
GGGGAAACGTGTAGCTCTGGAGCCCCAAGGGTGGATGCTATGCTCT  
GCAGGCATTTCTGCTCTCAAATTATAAAGGTCTTGGGAGCAAAGGGC  
AGGCCACTCAGAGCCACCACCCCCCTTTGCTTGCCATCTCTCCTT  
TACCTTTAGTGATGCTGAGAGTGTTATCTCCACTGGCCACAAAATCAT  
AGAGTGCCACAAAAGGTTGGGGTCATTTTCACTGGGCCAGCAAGA  
AGGTTTTCTTGGAGTTCATCGAGCTGCTTCGCTGAGACCCTGGGG  
CTCAAAGTCAGACCTAATAATTA AAAAGACCTGCCAGCAGGGGGCAGC  
TCATGCCTGCAGGATCTGAGACAGATATCTGTGGGGGAGGGGTGGGA  
TGGGGGCGGAGAANCANAGGAAAACAATCCCTGGCCTTCTTAGGGGA  
CAATTCTTCTTAGTTAAAGTTTACTCACAGGGTCCATCACATCCCCTC  
CTTGAGCTACTTACTTGAGCTCTGCTTAAAGCCGGTGGCTGA -3

PCR product sequence of BCR/ABL1 translocation in HEK293T :

CTTTGATCTCTTGCAGATGATGAGTCTCCGGGGCTCTATGGGTTTC  
TGAATGTCATCGTCCACTCAGCCACTGGATTTAAGCAGAGTTCAAGTA  
AGTACTGGTTTGGGGAGGAGGGTTCAGCGGCCGAGCCAGGGTCTC  
CACCCAGGAAGGACTAATCGGGCAGGGTGTGGGGAAACAGGGAGGT  
TGTTCAGATGACCACGGGACACCTTTGACCCTGGCCGCTGTGGAGTG  
TTTGTGCTGGTTGATGCCTTCTGGGTGTGGAATTGTTTTAATAGGAAT  
GTGTAATGTTGGAAACACAAATATTTTTGCTTCTGAGAATAAACTAA  
TTTTTTCTCCCAATTTTCTCTTCTTTTCTTTTTTCTGTTCCCCCTTI  
CTCTTCCAGAAGCCCTCAGCGGCCAGTAGCATCTGACTTTGAGCCTC  
AGGGTCTGAGTGAAGCCGCTCGTTGGAACCTCCAAGGAAAACCTTCTC  
GCTGGACCAGTGAAAATGACCCCAACCTTTTCGTTGCACTGTATGAT  
TTTGTGGCCAGTGGAGATAACACTCTAAGCATAA
